# Supplementary material
Source: Springer Nature journal article supplement (https://www.springermedizin.de/resource/supplementary/12913_2011_2050_MOESM2_ESM.pdf/9529638)

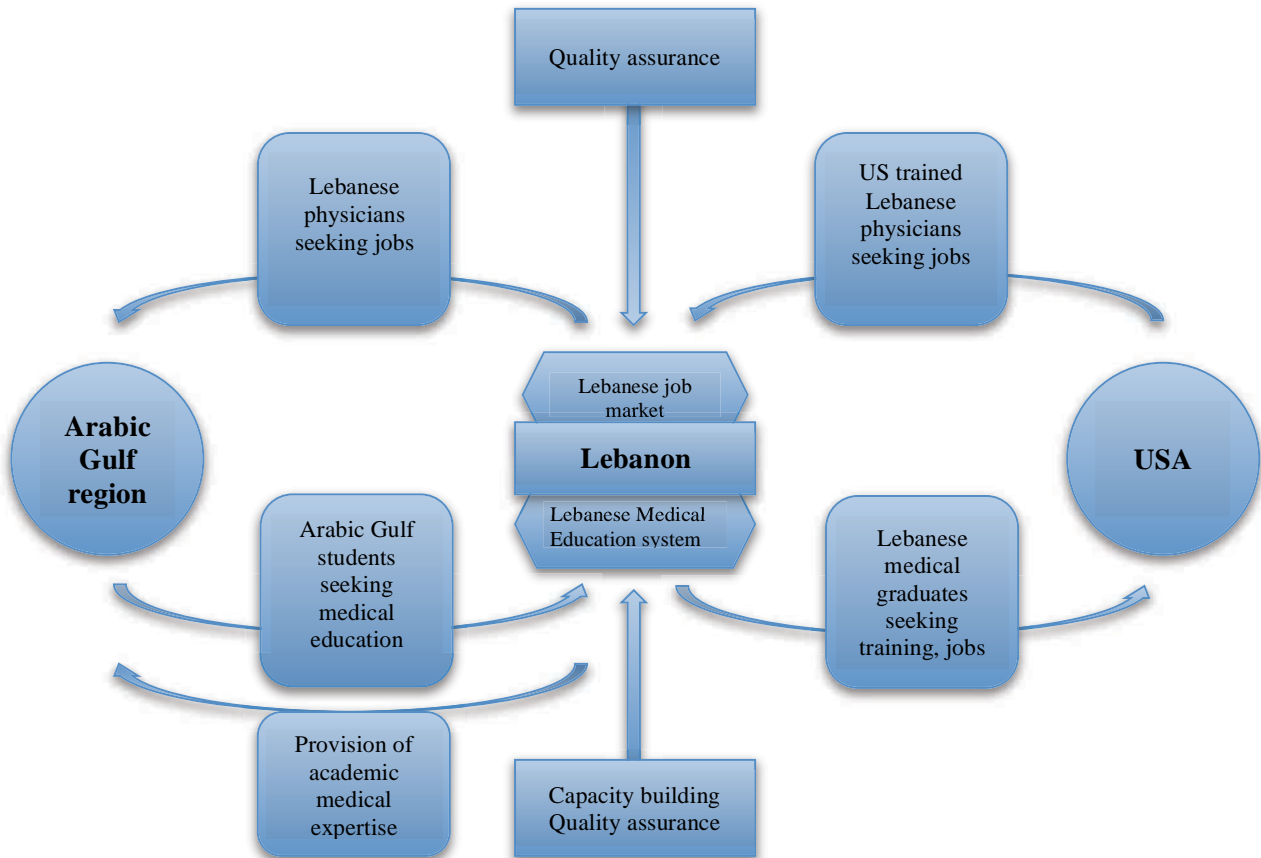



Supplement: MOESM2 [file 9529638]
